# Supplementary material
Source: HighWire-hosted journal article supplement (https://bmjpaedsopen.bmj.com/content/suppl/2021/02/04/10.1136.bmjpo-2020-000971)
Supplement: bmjpo-2020-000971supp003_data_supplement.pdf [file bmjpo-2020-000971supp003_data_supplement.pdf]

### Appendix 3. Details of members of the panel

| Name              | Expertise                           | Affiliation                                                                                                            |
|-------------------|-------------------------------------|------------------------------------------------------------------------------------------------------------------------|
| B. Aertgeerts     | General practitioner, chair         | Academic Centre of General Practice, KU Leuven, Belgium                                                                |
| G.E. Bekkering    | Methodologist                       | Academic Centre of General Practice, KU Leuven; Centre for Evidence-based Medicine, Leuven, Belgium                    |
| N. Delvaux        | Methodologist, general practitioner | Academic Centre of General Practice, KU Leuven, Belgium                                                                |
| P. Vankrunkelsven | Methodologist, general practitioner | Academic Centre of General Practice, KU Leuven; Centre for Evidence-based Medicine, Belgium                            |
| J. Toelen         | Paediatrician                       | UZ Leuven; Department of Development and Regeneration, KU Leuven, Belgium                                              |
| O. Plomteux       | Pupil 4th year                      | Secondary school St Dimpna, Geel, Belgium                                                                              |
| N. Milissen       | Pupil 4th year                      | Secondary school Heilig Hart, Heverlee, Belgium                                                                        |
| L. Rans           | Pupil 4th year                      | Secondary school Heilig Hart, Heverlee, Belgium                                                                        |
| K. Masschalck     | Parent                              | Veerle, Belgium                                                                                                        |
| A. Pascal         | Teacher secondary education         | Hotelschool Ter Groene Poorte, Brugge, Belgium                                                                         |
| L. Sweldens       | Teacher special primary education   | BLO De Olm, Herk-de-Stad, Belgium                                                                                      |
| S. Aertgeerts     | Director nursery education          | Primary school Heilig Hart, Heverlee, Belgium                                                                          |
| J. Vandebussche   | Director primary education          | Primary school Boven-Lo, Kessel-Lo, Belgium                                                                            |
| I. Devisch        | Philosopher of Medicine and Ethics  | Department of Public Health and Primary Care UGent, Gent, Belgium                                                      |
| T. Lernout        | Epidemiologist                      | Sciensano, Brussels, Belgium                                                                                           |
| E. Wollants       | Manager COVID lab                   | Clinical and Epidemiological Virology KU Leuven; REGA Institute, Leuven, Belgium                                       |
| M. Raes           | Paediatrician                       | Jessa Hospital, Hasselt, Belgium                                                                                       |
| S. Crommen        | Child and adolescent psychiatrist   | Practice for Child psychiatry Zutendaal, voorzitter VVK vzw, Belgium                                                   |
| G. Molenberghs    | Biostatistician                     | I-BioStat, UHasselt/ KU Leuven, Belgium                                                                                |
| A. Seghers        | Physician (youth health care)       | VCLB Leuven, Belgium                                                                                                   |
| P. De Bruyckere   | Psychologist, educationalist        | Teacher Training Department, Artevelde University College, Belgium; researcher, SCS, University of Leiden, Netherlands |
| G. Vanham         | Immuno-virologist                   | Institute of Tropical Medicine and University of Antwerp, Belgium                                                      |
